# Supplementary material
Source: publisher figshare collection journal article supplement (https://gsajournals.figshare.com/ndownloader/files/13824191)
Supplement: Supplementary file 1 [file 13824191]

Genotype	Latitude	Longitude	Population
Blackwell_01	36.76	97.24	U8X-W
Blackwell_02	36.76	97.24	U8X-W
Blackwell_03	36.76	97.24	U8X-W
Blackwell_04	36.76	97.24	U8X-W
Blackwell_05	36.76	97.24	U8X-W
Blackwell_06	36.76	97.24	U8X-W
Blackwell_07	36.76	97.24	U8X-W
Blackwell_08	36.76	97.24	U8X-W
Blackwell_09	36.76	97.24	U8X-W
Blackwell_10	36.76	97.24	U8X-W
Carthage_01	35.31	79.3	U8X-S
Carthage_02	35.31	79.3	U8X-S
Carthage_03	35.31	79.3	U8X-S
Carthage_04	35.31	79.3	U8X-S
Carthage_05	35.31	79.3	U8X-S
Carthage_06	35.31	79.3	U8X-S
Cave.in.Rock_01	37.47	88.16	U8X-E
Cave.in.Rock_02	37.47	88.16	U8X-E
Cave.in.Rock_03	37.47	88.16	U8X-E
Cave.in.Rock_04	37.47	88.16	U8X-E
Cave.in.Rock_05	37.47	88.16	U8X-E
Cave.in.Rock_06	37.47	88.16	U8X-E
Cave.in.Rock_07	37.47	88.16	U8X-E
Cave.in.Rock_08	37.47	88.16	U8X-E
Cave.in.Rock_09	37.47	88.16	U8X-E
Cave.in.Rock_10	37.47	88.16	U8X-E
Dacotah_01	46.38	100.94	U4X-N
Dacotah_02	46.38	100.94	U4X-N
Dacotah_03	46.38	100.94	U4X-N
Dacotah_04	46.38	100.94	U4X-N
Dacotah_05	46.38	100.94	U4X-N
Dacotah_06	46.38	100.94	U4X-N
Dacotah_07	46.38	100.94	U4X-N
Dacotah_08	46.38	100.94	U4X-N
ECS.1_02	39.82	74.53	L4X-NE
ECS.1_03	39.82	74.53	L4X-NE
ECS.1_05	39.82	74.53	L4X-NE
ECS.1_06	39.82	74.53	L4X-NE
ECS.1_07	39.82	74.53	L4X-NE
ECS.10_01	40.95	79.62	U8X-E
ECS.10_03	40.95	79.62	U8X-E
ECS.10_07	40.95	79.62	U8X-E
ECS.10_08	40.95	79.62	U8X-E
ECS.10_09	40.95	79.62	U8X-E
ECS.10_10	40.95	79.62	U8X-E
ECS.11_01	41.4	79.77	U8X-E
ECS.11_02	41.4	79.77	U8X-E
ECS.11_04	41.4	79.77	U8X-E
ECS.11_05	41.4	79.77	U8X-E
ECS.11_07	41.4	79.77	U8X-E
ECS.12_01	42.72	73.83	U8X-W
ECS.12_02	42.72	73.83	U8X-W
ECS.12_03	42.72	73.83	U8X-W
ECS.12_04	42.72	73.83	U8X-W
ECS.12_05	42.72	73.83	U8X-W
ECS.12_06	42.72	73.83	U8X-W
ECS.12_07	42.72	73.83	U8X-W
ECS.2_01	41.58	83.67	U8X-W
ECS.2_02	41.58	83.67	U8X-W
ECS.2_03	41.58	83.67	U8X-W
ECS.2_04	41.58	83.67	U8X-W
ECS.2_06	41.58	83.67	U8X-W
ECS.2_07	41.58	83.67	U8X-W
ECS.6_02	38.08	75.33	L4X-NE
ECS.6_03	38.08	75.33	L4X-NE
High.Tide_01	39.61	76.15	L4X-NE
High.Tide_02	39.61	76.15	L4X-NE
High.Tide_03	39.61	76.15	L4X-NE
High.Tide_04	39.61	76.15	L4X-NE
High.Tide_05	39.61	76.15	L4X-NE
High.Tide_06	39.61	76.15	L4X-NE
High.Tide_08	39.61	76.15	L4X-NE
High.Tide_09	39.61	76.15	L4X-NE
High.Tide_10	39.61	76.15	L4X-NE
Kanlow_01	35.26	96.18	L4X-S
Kanlow_02	35.26	96.18	L4X-S
Kanlow_03	35.26	96.18	L4X-S
Kanlow_04	35.26	96.18	L4X-S
Kanlow_05	35.26	96.18	L4X-S
Kanlow_06	35.26	96.18	L4X-S
Kanlow_07	35.26	96.18	L4X-S
Kanlow_08	35.26	96.18	L4X-S
Kanlow_09	35.26	96.18	L4X-S
Kanlow_10	35.26	96.18	L4X-S
KY1625_01	37.94	80.99	U8X-E
KY1625_02	37.94	80.99	U8X-E
KY1625_03	37.94	80.99	U8X-E
KY1625_04	37.94	80.99	U8X-E
KY1625_05	37.94	80.99	U8X-E
KY1625_06	37.94	80.99	U8X-E
KY1625_07	37.94	80.99	U8X-E
KY1625_08	37.94	80.99	U8X-E
KY1625_09	37.94	80.99	U8X-E
KY1625_10	37.94	80.99	U8X-E
Pathfinder_01	41.2	96.5	U8X-W
Pathfinder_02	41.2	96.5	U8X-W
Pathfinder_03	41.2	96.5	U8X-W
Pathfinder_04	41.2	96.5	U8X-W
Pathfinder_05	41.2	96.5	U8X-W
Pathfinder_06	41.2	96.5	U8X-W
Pathfinder_07	41.2	96.5	U8X-W
Pathfinder_08	41.2	96.5	U8X-W
Pathfinder_09	41.2	96.5	U8X-W
Pathfinder_10	41.2	96.5	U8X-W
Shelter_01	39.41	81.2	U8X-E
Shelter_02	39.41	81.2	U8X-E
Shelter_04	39.41	81.2	U8X-E
Shelter_05	39.41	81.2	U8X-E
Shelter_06	39.41	81.2	U8X-E
Shelter_07	39.41	81.2	U8X-E
Shelter_08	39.41	81.2	U8X-E
Shelter_09	39.41	81.2	U8X-E
Shelter_10	39.41	81.2	U8X-E
Sunburst_01	42.6	92.6	U8X-W
Sunburst_02	42.6	92.6	U8X-W
Sunburst_04	42.6	92.6	U8X-W
Sunburst_05	42.6	92.6	U8X-W
Sunburst_06	42.6	92.6	U8X-W
Sunburst_07	42.6	92.6	U8X-W
Sunburst_08	42.6	92.6	U8X-W
Sunburst_09	42.6	92.6	U8X-W
Sunburst_10	42.6	92.6	U8X-W
SW102_01	44.01666667	91.48333333	U4X-N
SW102_02	44.01666667	91.48333333	U4X-N
SW102_03	44.01666667	91.48333333	U4X-N
SW102_04	44.01666667	91.48333333	U4X-N
SW102_05	44.01666667	91.48333333	U4X-N
SW102_06	44.01666667	91.48333333	U4X-N
SW102_07	44.01666667	91.48333333	U4X-N
SW102_08	44.01666667	91.48333333	U4X-N
SW102_09	44.01666667	91.48333333	U4X-N
SW102_10	44.01666667	91.48333333	U4X-N
SW109_01	44.26666667	89.66666667	U8X-W
SW109_02	44.26666667	89.66666667	U8X-W
SW109_03	44.26666667	89.66666667	U4X-N
SW109_04	44.26666667	89.66666667	U8X-W
SW109_05	44.26666667	89.66666667	U8X-W
SW109_06	44.26666667	89.66666667	U8X-W
SW109_07	44.26666667	89.66666667	U8X-W
SW109_09	44.26666667	89.66666667	U8X-W
SW109_10	44.26666667	89.66666667	U8X-W
SW110_01	44.2	89.66666667	U8X-W
SW110_02	44.2	89.66666667	U8X-W
SW110_03	44.2	89.66666667	U8X-W
SW110_04	44.2	89.66666667	U8X-W
SW110_05	44.2	89.66666667	U8X-W
SW110_06	44.2	89.66666667	U8X-W
SW110_07	44.2	89.66666667	U8X-W
SW110_08	44.2	89.66666667	U8X-W
SW110_09	44.2	89.66666667	U8X-W
SW110_10	44.2	89.66666667	U8X-W
SW112_01	43.46666667	89.43333333	U8X-W
SW112_02	43.46666667	89.43333333	U8X-W
SW112_03	43.46666667	89.43333333	U8X-W
SW112_04	43.46666667	89.43333333	U8X-W
SW112_05	43.46666667	89.43333333	U8X-W
SW112_06	43.46666667	89.43333333	U8X-W
SW112_07	43.46666667	89.43333333	U8X-W
SW112_08	43.46666667	89.43333333	U8X-W
SW112_09	43.46666667	89.43333333	U8X-W
SW112_10	43.46666667	89.43333333	U8X-W
SW114_01	42.56666667	90.4	U4X-N
SW114_02	42.56666667	90.4	U4X-N
SW114_03	42.56666667	90.4	U4X-N
SW114_04	42.56666667	90.4	U4X-N
SW114_05	42.56666667	90.4	U8X-W
SW114_06	42.56666667	90.4	U8X-W
SW114_07	42.56666667	90.4	U8X-W
SW114_08	42.56666667	90.4	U8X-W
SW115_01	42.56666667	90.4	U4X-N
SW115_02	42.56666667	90.4	U4X-N
SW115_03	42.56666667	90.4	U4X-N
SW115_04	42.56666667	90.4	U4X-N
SW115_05	42.56666667	90.4	U4X-N
SW115_06	42.56666667	90.4	U4X-N
SW116_01	43.2	90.45	U4X-N
SW116_02	43.2	90.45	U4X-N
SW116_03	43.2	90.45	U4X-N
SW116_05	43.2	90.45	U4X-N
SW116_06	43.2	90.45	U4X-N
SW116_07	43.2	90.45	U4X-N
SW116_08	43.2	90.45	U4X-N
SW116_09	43.2	90.45	U4X-N
SW116_10	43.2	90.45	U4X-N
SW122_01	43.2	90.33333333	U8X-W
SW122_02	43.2	90.33333333	U8X-W
SW122_03	43.2	90.33333333	U8X-W
SW122_04	43.2	90.33333333	U8X-W
SW122_05	43.2	90.33333333	U8X-W
SW122_06	43.2	90.33333333	U8X-W
SW123_01	42.78333333	88.3	U8X-E
SW123_02	42.78333333	88.3	U8X-E
SW123_03	42.78333333	88.3	U8X-E
SW123_04	42.78333333	88.3	U8X-E
SW123_05	42.78333333	88.3	U8X-E
SW123_06	42.78333333	88.3	U8X-E
SW123_07	42.78333333	88.3	U8X-E
SW123_08	42.78333333	88.3	U8X-E
SW123_09	42.78333333	88.3	U8X-E
SW123_10	42.78333333	88.3	U8X-E
SW124_01	42.55	87.8	U4X-N
SW124_02	42.55	87.8	U4X-N
SW124_03	42.55	87.8	U4X-N
SW124_04	42.55	87.8	U4X-N
SW124_05	42.55	87.8	U4X-N
SW124_06	42.55	87.8	U4X-N
SW124_07	42.55	87.8	U4X-N
SW124_08	42.55	87.8	U4X-N
SW124_09	42.55	87.8	U4X-N
SW124_10	42.55	87.8	U4X-N
SW127_01	42.9	88.45	U8X-W
SW127_03	42.9	88.45	U8X-W
SW127_04	42.9	88.45	U8X-W
SW127_05	42.9	88.45	U8X-W
SW127_06	42.9	88.45	U8X-W
SW127_07	42.9	88.45	U8X-W
SW127_08	42.9	88.45	U8X-W
SW127_09	42.9	88.45	U8X-W
SW128_01	42.85	88.63333333	U8X-W
SW128_02	42.85	88.63333333	U8X-W
SW128_03	42.85	88.63333333	U8X-W
SW128_04	42.85	88.63333333	U8X-W
SW128_05	42.85	88.63333333	U8X-W
SW128_06	42.85	88.63333333	U8X-W
SW128_07	42.85	88.63333333	U8X-W
SW128_08	42.85	88.63333333	U8X-W
SW128_10	42.85	88.63333333	U8X-W
SW129_01	44.33333333	89.6	U4X-N
SW129_02	44.33333333	89.6	U4X-N
SW129_03	44.33333333	89.6	U4X-N
SW129_04	44.33333333	89.6	U4X-N
SW129_05	44.33333333	89.6	U4X-N
SW129_06	44.33333333	89.6	U4X-N
SW129_07	44.33333333	89.6	U4X-N
SW129_08	44.33333333	89.6	U4X-N
SW129_09	44.33333333	89.6	U4X-N
SW129_10	44.33333333	89.6	U4X-N
SW31_01	40.3	86.22	U4X-N
SW31_02	40.3	86.22	U4X-N
SW31_03	40.3	86.22	U4X-N
SW31_04	40.3	86.22	U4X-N
SW31_05	40.3	86.22	U4X-N
SW31_06	40.3	86.22	U4X-N
SW31_07	40.3	86.22	U4X-N
SW31_09	40.3	86.22	U4X-N
SW33_01	40.45	86.18	U8X-W
SW33_02	40.45	86.18	U8X-W
SW33_03	40.45	86.18	U8X-W
SW33_04	40.45	86.18	U8X-W
SW33_05	40.45	86.18	U8X-W
SW33_06	40.45	86.18	U8X-W
SW38_02	40.1	86.72	U8X-W
SW38_03	40.1	86.72	U8X-W
SW38_05	40.1	86.72	U8X-W
SW38_08	40.1	86.72	U8X-W
SW40_01	41.63	87.43	U4X-N
SW40_03	41.63	87.43	U4X-N
SW40_05	41.63	87.43	U4X-N
SW40_07	41.63	87.43	U4X-N
SW40_08	41.63	87.43	U4X-N
SW40_09	41.63	87.43	U4X-N
SW40_10	41.63	87.43	U4X-N
SW43_02	42.3	84.28	U4X-N
SW43_04	42.3	84.28	U4X-N
SW43_05	42.3	84.28	U4X-N
SW43_06	42.3	84.28	U4X-N
SW43_07	42.3	84.28	U4X-N
SW43_08	42.3	84.28	U4X-N
SW43_09	42.3	84.28	U4X-N
SW43_10	42.3	84.28	U4X-N
SW46_01	42.5	82.57	U4X-N
SW46_02	42.5	82.57	U4X-N
SW46_03	42.5	82.57	U4X-N
SW46_04	42.5	82.57	U4X-N
SW46_05	42.5	82.57	U4X-N
SW46_06	42.5	82.57	U4X-N
SW46_08	42.5	82.57	U4X-N
SW46_09	42.5	82.57	U4X-N
SW46_10	42.5	82.57	U4X-N
SW49_01	43.8	91.83	U4X-N
SW49_02	43.8	91.83	U4X-N
SW49_03	43.8	91.83	U4X-N
SW49_04	43.8	91.83	U4X-N
SW49_05	43.8	91.83	U4X-N
SW49_06	43.8	91.83	U4X-N
SW49_07	43.8	91.83	U4X-N
SW50_01	46.2	94.42	U8X-W
SW50_02	46.2	94.42	U8X-W
SW50_04	46.2	94.42	U8X-W
SW50_05	46.2	94.42	U8X-W
SW50_06	46.2	94.42	U8X-W
SW51_01	44.53	95.08	U8X-W
SW51_04	44.53	95.08	U8X-W
SW51_05	44.53	95.08	U8X-W
SW51_06	44.53	95.08	U8X-W
SW51_08	44.53	95.08	U8X-W
SW51_09	44.53	95.08	U8X-W
SW51_10	44.53	95.08	U8X-W
SW58_01	44.32	93.93	U8X-W
SW58_02	44.32	93.93	U8X-W
SW58_03	44.32	93.93	U8X-W
SW58_04	44.32	93.93	U8X-W
SW58_05	44.32	93.93	U8X-W
SW58_06	44.32	93.93	U8X-W
SW58_07	44.32	93.93	U8X-W
SW58_08	44.32	93.93	U8X-W
SW58_09	44.32	93.93	U8X-W
SW58_10	44.32	93.93	U8X-W
SW63_02	42.93	78.18	U4X-N
SW63_03	42.93	78.18	U4X-N
SW63_04	42.93	78.18	U4X-N
SW63_05	42.93	78.18	U4X-N
SW63_06	42.93	78.18	U4X-N
SW63_07	42.93	78.18	U4X-N
SW64_01	40.6	80.67	U8X-E
SW64_02	40.6	80.67	U8X-E
SW64_03	40.6	80.67	U8X-E
SW64_04	40.6	80.67	U8X-E
SW64_05	40.6	80.67	U8X-E
SW64_06	40.6	80.67	U8X-E
SW64_07	40.6	80.67	U8X-E
SW64_08	40.6	80.67	U8X-E
SW64_09	40.6	80.67	U8X-E
SW64_10	40.6	80.67	U8X-E
SW65_02	40.55	80.67	U8X-E
SW65_03	40.55	80.67	U8X-E
SW65_05	40.55	80.67	U8X-E
SW65_06	40.55	80.67	U8X-E
SW65_07	40.55	80.67	U8X-E
SW65_08	40.55	80.67	U8X-E
SW65_09	40.55	80.67	U4X-N
SW65_10	40.55	80.67	U4X-N
SW781_03	40.6	74.13	L4X-NE
SW781_04	40.6	74.13	L4X-NE
SW781_05	40.6	74.13	L4X-NE
SW781_06	40.6	74.13	L4X-NE
SW781_07	40.6	74.13	L4X-NE
SW781_08	40.6	74.13	L4X-NE
SW782_01	38.48	78.52	U8X-E
SW782_02	38.48	78.52	U8X-E
SW782_03	38.48	78.52	U8X-E
SW782_06	38.48	78.52	U8X-E
SW782_07	38.48	78.52	U8X-E
SW782_08	38.48	78.52	U8X-E
SW782_09	38.48	78.52	U8X-E
SW786_01	43	86	U4X-N
SW786_02	43	86	U4X-N
SW786_03	43	86	U4X-N
SW786_04	43	86	U4X-N
SW786_06	43	86	U4X-N
SW786_07	43	86	U4X-N
SW786_09	43	86	U4X-N
SW787_01	43.09	86.25	U4X-N
SW787_02	43.09	86.25	U4X-N
SW787_03	43.09	86.25	U4X-N
SW787_04	43.09	86.25	U4X-N
SW787_05	43.09	86.25	U4X-N
SW787_06	43.09	86.25	U4X-N
SW787_07	43.09	86.25	U4X-N
SW787_08	43.09	86.25	U4X-N
SW787_09	43.09	86.25	U4X-N
SW787_10	43.09	86.25	U4X-N
SW788_01	40.68	74.01	L4X-NE
SW788_02	40.68	74.01	L4X-NE
SW788_03	40.68	74.01	L4X-NE
SW788_04	40.68	74.01	L4X-NE
SW788_05	40.68	74.01	L4X-NE
SW788_06	40.68	74.01	L4X-NE
SW788_07	40.68	74.01	L4X-NE
SW788_08	40.68	74.01	L4X-NE
SW788_09	40.68	74.01	L4X-NE
SW788_10	40.68	74.01	L4X-NE
SW789_01	0	0	L4X-S
SW789_04	0	0	U8X-S
SW789_06	0	0	U8X-S
SW789_07	0	0	U8X-S
SW789_08	0	0	U8X-S
SW789_09	0	0	L4X-S
SW790_01	34.125	89.03333333	L4X-S
SW790_02	34.125	89.03333333	U4X-N
SW790_03	34.125	89.03333333	L4X-S
SW790_04	34.125	89.03333333	L4X-S
SW790_07	34.125	89.03333333	L4X-S
SW793_02	40.5	74.22	L4X-NE
SW793_03	40.5	74.22	L4X-NE
SW793_06	40.5	74.22	L4X-NE
SW793_09	40.5	74.22	L4X-NE
SW793_10	40.5	74.22	L4X-NE
SW795_01	40.6105	74.08188333	L4X-NE
SW795_02	40.6105	74.08188333	L4X-NE
SW795_04	40.6105	74.08188333	L4X-NE
SW795_06	40.6105	74.08188333	L4X-NE
SW795_07	40.6105	74.08188333	L4X-NE
SW795_08	40.6105	74.08188333	L4X-NE
SW795_09	40.6105	74.08188333	L4X-NE
SW795_10	40.6105	74.08188333	L4X-NE
SW796_01	40.62	74.18	L4X-NE
SW796_02	40.62	74.18	L4X-NE
SW796_03	40.62	74.18	L4X-NE
SW796_04	40.62	74.18	L4X-NE
SW796_05	40.62	74.18	L4X-NE
SW796_06	40.62	74.18	L4X-NE
SW796_07	40.62	74.18	L4X-NE
SW796_08	40.62	74.18	L4X-NE
SW796_10	40.62	74.18	L4X-NE
SW797_01	40.72	73.58	L4X-NE
SW797_02	40.72	73.58	L4X-NE
SW797_03	40.72	73.58	L4X-NE
SW797_04	40.72	73.58	L4X-NE
SW797_05	40.72	73.58	L4X-NE
SW797_06	40.72	73.58	L4X-NE
SW797_09	40.72	73.58	L4X-NE
SW797_10	40.72	73.58	L4X-NE
SW798_01	41.04	71.93	L4X-NE
SW798_05	41.04	71.93	L4X-NE
SW798_06	41.04	71.93	L4X-NE
SW798_09	41.04	71.93	L4X-NE
SW798_10	41.04	71.93	L4X-NE
SW799_02	41.04	71.93	L4X-NE
SW799_03	41.04	71.93	L4X-NE
SW799_05	41.04	71.93	L4X-NE
SW799_07	41.04	71.93	L4X-NE
SW799_08	41.04	71.93	L4X-NE
SW799_09	41.04	71.93	L4X-NE
SW799_10	41.04	71.93	L4X-NE
SW802_01	40.72	73.58	L4X-NE
SW802_02	40.72	73.58	L4X-NE
SW802_04	40.72	73.58	L4X-NE
SW802_05	40.72	73.58	L4X-NE
SW802_06	40.72	73.58	L4X-NE
SW803_02	41.04	71.93	L4X-NE
SW803_03	41.04	71.93	L4X-NE
SW803_04	41.04	71.93	L4X-NE
SW803_05	41.04	71.93	L4X-NE
SW803_06	41.04	71.93	L4X-NE
SW803_07	41.04	71.93	L4X-NE
SW803_08	41.04	71.93	L4X-NE
SW803_09	41.04	71.93	L4X-NE
SW803_10	41.04	71.93	L4X-NE
SW805_01	41.02	72.01	L4X-NE
SW805_02	41.02	72.01	L4X-NE
SW805_03	41.02	72.01	L4X-NE
SW805_04	41.02	72.01	L4X-NE
SW805_05	41.02	72.01	L4X-NE
SW805_06	41.02	72.01	L4X-NE
SW805_07	41.02	72.01	L4X-NE
SW805_08	41.02	72.01	L4X-NE
SW805_09	41.02	72.01	L4X-NE
SW806_01	40.94	72.28	L4X-NE
SW806_02	40.94	72.28	L4X-NE
SW806_03	40.94	72.28	L4X-NE
SW806_04	40.94	72.28	L4X-NE
SW806_05	40.94	72.28	L4X-NE
SW806_06	40.94	72.28	L4X-NE
SW806_07	40.94	72.28	L4X-NE
SW806_08	40.94	72.28	L4X-NE
SW806_09	40.94	72.28	L4X-NE
SW808_01	39.68	79.81	U8X-E
SW808_02	39.68	79.81	U8X-E
SW808_03	39.68	79.81	U8X-E
SW808_04	39.68	79.81	U8X-E
SW808_05	39.68	79.81	U8X-E
SW808_06	39.68	79.81	U8X-E
SW808_07	39.68	79.81	U8X-E
SW808_08	39.68	79.81	U8X-E
SW808_09	39.68	79.81	U8X-E
SW808_10	39.68	79.81	U8X-E
SW809_01	39.41	79.66	U8X-E
SW809_02	39.41	79.66	U8X-E
SW809_03	39.41	79.66	U8X-E
SW809_04	39.41	79.66	U8X-E
SW809_05	39.41	79.66	U8X-E
SW809_06	39.41	79.66	U8X-E
SW809_07	39.41	79.66	U8X-E
SW809_08	39.41	79.66	U8X-E
SW809_09	39.41	79.66	U8X-E
SW809_10	39.41	79.66	U8X-E
WS4U-C2_001	0	0	WS4U-C2
WS4U-C2_002	0	0	WS4U-C2
WS4U-C2_003	0	0	WS4U-C2
WS4U-C2_004	0	0	WS4U-C2
WS4U-C2_005	0	0	WS4U-C2
WS4U-C2_006	0	0	WS4U-C2
WS4U-C2_007	0	0	WS4U-C2
WS4U-C2_008	0	0	WS4U-C2
WS4U-C2_009	0	0	WS4U-C2
WS4U-C2_010	0	0	WS4U-C2
WS4U-C2_011	0	0	WS4U-C2
WS4U-C2_012	0	0	WS4U-C2
WS4U-C2_013	0	0	WS4U-C2
WS4U-C2_014	0	0	WS4U-C2
WS4U-C2_015	0	0	WS4U-C2
WS4U-C2_016	0	0	WS4U-C2
WS4U-C2_017	0	0	WS4U-C2
WS4U-C2_018	0	0	WS4U-C2
WS4U-C2_019	0	0	WS4U-C2
WS4U-C2_020	0	0	WS4U-C2
WS4U-C2_021	0	0	WS4U-C2
WS4U-C2_022	0	0	WS4U-C2
WS4U-C2_023	0	0	WS4U-C2
WS4U-C2_024	0	0	WS4U-C2
WS4U-C2_026	0	0	WS4U-C2
WS4U-C2_027	0	0	WS4U-C2
WS4U-C2_028	0	0	WS4U-C2
WS4U-C2_029	0	0	WS4U-C2
WS4U-C2_030	0	0	WS4U-C2
WS4U-C2_031	0	0	WS4U-C2
WS4U-C2_032	0	0	WS4U-C2
WS4U-C2_033	0	0	WS4U-C2
WS4U-C2_034	0	0	WS4U-C2
WS4U-C2_035	0	0	WS4U-C2
WS4U-C2_036	0	0	WS4U-C2
WS4U-C2_037	0	0	WS4U-C2
WS4U-C2_038	0	0	WS4U-C2
WS4U-C2_039	0	0	WS4U-C2
WS4U-C2_040	0	0	WS4U-C2
WS4U-C2_041	0	0	WS4U-C2
WS4U-C2_042	0	0	WS4U-C2
WS4U-C2_045	0	0	WS4U-C2
WS4U-C2_046	0	0	WS4U-C2
WS4U-C2_048	0	0	WS4U-C2
WS4U-C2_049	0	0	WS4U-C2
WS4U-C2_050	0	0	WS4U-C2
WS4U-C2_051	0	0	WS4U-C2
WS4U-C2_052	0	0	WS4U-C2
WS4U-C2_053	0	0	WS4U-C2
WS4U-C2_054	0	0	WS4U-C2
WS4U-C2_055	0	0	WS4U-C2
WS4U-C2_056	0	0	WS4U-C2
WS4U-C2_057	0	0	WS4U-C2
WS4U-C2_058	0	0	WS4U-C2
WS4U-C2_059	0	0	WS4U-C2
WS4U-C2_060	0	0	WS4U-C2
WS4U-C2_061	0	0	WS4U-C2
WS4U-C2_062	0	0	WS4U-C2
WS4U-C2_063	0	0	WS4U-C2
WS4U-C2_064	0	0	WS4U-C2
WS4U-C2_065	0	0	WS4U-C2
WS4U-C2_066	0	0	WS4U-C2
WS4U-C2_067	0	0	WS4U-C2
WS4U-C2_068	0	0	WS4U-C2
WS4U-C2_069	0	0	WS4U-C2
WS4U-C2_070	0	0	WS4U-C2
WS4U-C2_071	0	0	WS4U-C2
WS4U-C2_072	0	0	WS4U-C2
WS4U-C2_073	0	0	WS4U-C2
WS4U-C2_074	0	0	WS4U-C2
WS4U-C2_075	0	0	WS4U-C2
WS4U-C2_076	0	0	WS4U-C2
WS4U-C2_077	0	0	WS4U-C2
WS4U-C2_078	0	0	WS4U-C2
WS4U-C2_079	0	0	WS4U-C2
WS4U-C2_080	0	0	WS4U-C2
WS4U-C2_081	0	0	WS4U-C2
WS4U-C2_082	0	0	WS4U-C2
WS4U-C2_083	0	0	WS4U-C2
WS4U-C2_084	0	0	WS4U-C2
WS4U-C2_087	0	0	WS4U-C2
WS4U-C2_088	0	0	WS4U-C2
WS4U-C2_089	0	0	WS4U-C2
WS4U-C2_090	0	0	WS4U-C2
WS4U-C2_091	0	0	WS4U-C2
WS4U-C2_092	0	0	WS4U-C2
WS4U-C2_093	0	0	WS4U-C2
WS4U-C2_094	0	0	WS4U-C2
WS4U-C2_095	0	0	WS4U-C2
WS4U-C2_096	0	0	WS4U-C2
WS4U-C2_097	0	0	WS4U-C2
WS4U-C2_098	0	0	WS4U-C2
WS4U-C2_099	0	0	WS4U-C2
WS4U-C2_100	0	0	WS4U-C2
WS4U-C2_101	0	0	WS4U-C2
WS4U-C2_102	0	0	WS4U-C2
WS4U-C2_103	0	0	WS4U-C2
WS4U-C2_104	0	0	WS4U-C2
WS4U-C2_105	0	0	WS4U-C2
WS4U-C2_106	0	0	WS4U-C2
WS4U-C2_107	0	0	WS4U-C2
WS4U-C2_108	0	0	WS4U-C2
WS4U-C2_110	0	0	WS4U-C2
WS4U-C2_111	0	0	WS4U-C2
WS4U-C2_112	0	0	WS4U-C2
WS4U-C2_113	0	0	WS4U-C2
WS4U-C2_114	0	0	WS4U-C2
WS4U-C2_115	0	0	WS4U-C2
WS4U-C2_116	0	0	WS4U-C2
WS4U-C2_117	0	0	WS4U-C2
WS4U-C2_118	0	0	WS4U-C2
WS4U-C2_119	0	0	WS4U-C2
WS4U-C2_120	0	0	WS4U-C2
WS4U-C2_121	0	0	WS4U-C2
WS4U-C2_122	0	0	WS4U-C2
WS4U-C2_123	0	0	WS4U-C2
WS4U-C2_124	0	0	WS4U-C2
WS4U-C2_125	0	0	WS4U-C2
WS4U-C2_126	0	0	WS4U-C2
WS4U-C2_127	0	0	WS4U-C2
WS4U-C2_128	0	0	WS4U-C2
WS4U-C2_129	0	0	WS4U-C2
WS4U-C2_130	0	0	WS4U-C2
WS4U-C2_132	0	0	WS4U-C2
WS4U-C2_133	0	0	WS4U-C2
WS4U-C2_134	0	0	WS4U-C2
WS4U-C2_135	0	0	WS4U-C2
WS4U-C2_136	0	0	WS4U-C2
WS4U-C2_137	0	0	WS4U-C2
WS4U-C2_138	0	0	WS4U-C2
WS4U-C2_139	0	0	WS4U-C2
WS4U-C2_140	0	0	WS4U-C2
WS4U-C2_141	0	0	WS4U-C2
WS4U-C2_142	0	0	WS4U-C2
WS4U-C2_143	0	0	WS4U-C2
WS4U-C2_144	0	0	WS4U-C2
Liberty-C2_10107	0	0	Liberty-C2
Liberty-C2_10110	0	0	Liberty-C2
Liberty-C2_10203	0	0	Liberty-C2
Liberty-C2_10209	0	0	Liberty-C2
Liberty-C2_10303	0	0	Liberty-C2
Liberty-C2_10309	0	0	Liberty-C2
Liberty-C2_10310	0	0	Liberty-C2
Liberty-C2_10602	0	0	Liberty-C2
Liberty-C2_10604	0	0	Liberty-C2
Liberty-C2_10605	0	0	Liberty-C2
Liberty-C2_10607	0	0	Liberty-C2
Liberty-C2_10608	0	0	Liberty-C2
Liberty-C2_10808	0	0	Liberty-C2
Liberty-C2_13201	0	0	Liberty-C2
Liberty-C2_13202	0	0	Liberty-C2
Liberty-C2_13203	0	0	Liberty-C2
Liberty-C2_13208	0	0	Liberty-C2
Liberty-C2_20306	0	0	Liberty-C2
Liberty-C2_20308	0	0	Liberty-C2
Liberty-C2_20701	0	0	Liberty-C2
Liberty-C2_20710	0	0	Liberty-C2
Liberty-C2_21603	0	0	Liberty-C2
Liberty-C2_21901	0	0	Liberty-C2
Liberty-C2_21902	0	0	Liberty-C2
Liberty-C2_21905	0	0	Liberty-C2
Liberty-C2_21908	0	0	Liberty-C2
Liberty-C2_21909	0	0	Liberty-C2
Liberty-C2_21910	0	0	Liberty-C2
Liberty-C2_22901	0	0	Liberty-C2
Liberty-C2_22902	0	0	Liberty-C2
Liberty-C2_22908	0	0	Liberty-C2
Liberty-C2_22909	0	0	Liberty-C2
Liberty-C2_22910	0	0	Liberty-C2
Liberty-C2_23105	0	0	Liberty-C2
Liberty-C2_23109	0	0	Liberty-C2
Liberty-C2_23110	0	0	Liberty-C2
Liberty-C2_30501	0	0	Liberty-C2
Liberty-C2_30503	0	0	Liberty-C2
Liberty-C2_30505	0	0	Liberty-C2
Liberty-C2_30506	0	0	Liberty-C2
Liberty-C2_30510	0	0	Liberty-C2
Liberty-C2_30802	0	0	Liberty-C2
Liberty-C2_30803	0	0	Liberty-C2
Liberty-C2_31303	0	0	Liberty-C2
Liberty-C2_31308	0	0	Liberty-C2
Liberty-C2_31309	0	0	Liberty-C2
Liberty-C2_31801	0	0	Liberty-C2
Liberty-C2_31804	0	0	Liberty-C2
Liberty-C2_31807	0	0	Liberty-C2
Liberty-C2_31809	0	0	Liberty-C2
Liberty-C2_31810	0	0	Liberty-C2
Liberty-C2_31901	0	0	Liberty-C2
Liberty-C2_31904	0	0	Liberty-C2
Liberty-C2_31905	0	0	Liberty-C2
Liberty-C2_31907	0	0	Liberty-C2
Liberty-C2_31909	0	0	Liberty-C2
Liberty-C2_31910	0	0	Liberty-C2
Liberty-C2_33102	0	0	Liberty-C2
Liberty-C2_33105	0	0	Liberty-C2
Liberty-C2_33108	0	0	Liberty-C2
Liberty-C2_33109	0	0	Liberty-C2
Liberty-C2_40403	0	0	Liberty-C2
Liberty-C2_40406	0	0	Liberty-C2
Liberty-C2_40408	0	0	Liberty-C2
Liberty-C2_40409	0	0	Liberty-C2
Liberty-C2_41003	0	0	Liberty-C2
Liberty-C2_41005	0	0	Liberty-C2
Liberty-C2_41007	0	0	Liberty-C2
Liberty-C2_41008	0	0	Liberty-C2
Liberty-C2_41010	0	0	Liberty-C2
Liberty-C2_41101	0	0	Liberty-C2
Liberty-C2_41103	0	0	Liberty-C2
Liberty-C2_41106	0	0	Liberty-C2
Liberty-C2_41107	0	0	Liberty-C2
Liberty-C2_41108	0	0	Liberty-C2
Liberty-C2_41701	0	0	Liberty-C2
Liberty-C2_41702	0	0	Liberty-C2
Liberty-C2_41706	0	0	Liberty-C2
Liberty-C2_41707	0	0	Liberty-C2
Liberty-C2_42102	0	0	Liberty-C2
Liberty-C2_42103	0	0	Liberty-C2
Liberty-C2_42104	0	0	Liberty-C2
Liberty-C2_42107	0	0	Liberty-C2
Liberty-C2_42109	0	0	Liberty-C2
Liberty-C2_42401	0	0	Liberty-C2
Liberty-C2_42402	0	0	Liberty-C2
Liberty-C2_42403	0	0	Liberty-C2
Liberty-C2_42406	0	0	Liberty-C2
Liberty-C2_42408	0	0	Liberty-C2
Liberty-C2_42410	0	0	Liberty-C2
Liberty-C2_51002	0	0	Liberty-C2
Liberty-C2_51004	0	0	Liberty-C2
Liberty-C2_51007	0	0	Liberty-C2
Liberty-C2_51008	0	0	Liberty-C2
Liberty-C2_51009	0	0	Liberty-C2
Liberty-C2_51307	0	0	Liberty-C2
Liberty-C2_51309	0	0	Liberty-C2
Liberty-C2_51503	0	0	Liberty-C2
Liberty-C2_51505	0	0	Liberty-C2
Liberty-C2_51510	0	0	Liberty-C2
Liberty-C2_52806	0	0	Liberty-C2
Liberty-C2_52807	0	0	Liberty-C2
Liberty-C2_52810	0	0	Liberty-C2
Liberty-C2_53102	0	0	Liberty-C2
Liberty-C2_53103	0	0	Liberty-C2
Liberty-C2_53104	0	0	Liberty-C2
Liberty-C2_53105	0	0	Liberty-C2
Liberty-C2_53106	0	0	Liberty-C2
Liberty-C2_53502	0	0	Liberty-C2
Liberty-C2_53504	0	0	Liberty-C2
SWG32_01	42.33	89.02	L4X-S
SWG32_02	42.33	89.02	L4X-S
SWG32_03	42.33	89.02	L4X-S
SWG32_04	42.33	89.02	L4X-S
SWG32_05	42.33	89.02	L4X-S
SWG32_08	42.33	89.02	L4X-S
SWG32_10	42.33	89.02	L4X-S
SWG39_01	43.44	92.38	L4X-S
SWG39_02	43.44	92.38	L4X-S
SWG39_05	43.44	92.38	L4X-S
SWG39_06	43.44	92.38	L4X-S
SWG39_07	43.44	92.38	L4X-S
SWG39_08	43.44	92.38	L4X-S
SWG39_09	43.44	92.38	L4X-S
Timber_01	0	0	L4X-S
Timber_02	0	0	L4X-S
Timber_03	0	0	L4X-S
Timber_04	0	0	L4X-S
Timber_05	0	0	L4X-S
Timber_06	0	0	L4X-S
Timber_07	0	0	L4X-S
WS4U_02	0	0	U4X-N
WS4U_03	0	0	U4X-N
WS4U_05	0	0	U4X-N
WS4U_06	0	0	U4X-N
WS4U_07	0	0	U4X-N
WS4U_08	0	0	U4X-N
WS4U_09	0	0	U4X-N
WS4U_10	0	0	U4X-N
WS98.SB_01	45.08	92.83	U8X-E
WS98.SB_02	45.08	92.83	U4X-N
WS98.SB_04	45.08	92.83	U4X-N
WS98.SB_05	45.08	92.83	U4X-N
WS98.SB_06	45.08	92.83	U4X-N
WS98.SB_07	45.08	92.83	U8X-E
WS98.SB_09	45.08	92.83	U8X-E
WS98.SB_10	45.08	92.83	U8X-E
